# Supplementary material for: Syndromic Retinitis Pigmentosa: A 15-Patient Study
Source: MDPI journal article supplement (doi:10.3390/genes15040516), 2024-04-20
Supplement: s1 [file s1]

## CLINICAL EVALUATION PROTOCOL

### Personal data

Name: \_\_\_\_\_ Sex: \_\_\_\_\_

Birth date and place: \_\_\_\_\_

### History of present illness

Symptoms: \_\_\_\_\_

\_\_\_\_\_

\_\_\_\_\_

Age of onset: \_\_\_\_\_ fundoscopic diagnosis: \_\_\_\_\_ NGS evaluation: \_\_\_\_\_

### Obstetrical and perinatal background

\_\_\_\_\_

\_\_\_\_\_

\_\_\_\_\_

### Medical background

Neurodevelopment:     • normal     • delayed

Other neurological comorbidities: \_\_\_\_\_

Infectious disease: \_\_\_\_\_

Dermatological comorbidities: \_\_\_\_\_

Other ocular comorbidities: \_\_\_\_\_

Otorhinolaryngological comorbidities: \_\_\_\_\_

Cardiovascular comorbidities: \_\_\_\_\_

Gastrointestinal comorbidities: \_\_\_\_\_

Genitourinary comorbidities: \_\_\_\_\_

Orthopedical comorbidities:\_\_\_\_\_

Other:\_\_\_\_\_

### **Familial history**

Parental consanguinity: • no • yes, specify:\_\_\_\_\_

Recurrence of the condition:\_\_\_\_\_

Other relevant conditions:\_\_\_\_\_

Ethnic background:\_\_\_\_\_

### **Physical examination**

Anthropometry:\_\_\_\_\_

Dysmorphological features (face, torso, and limbs): \_\_\_\_\_

\_\_\_\_\_

### **Complementary exams**

Fundoscopy:\_\_\_\_\_

\_\_\_\_\_

Other ophthalmological exams:\_\_\_\_\_

\_\_\_\_\_

Others:\_\_\_\_\_

\_\_\_\_\_

\_\_\_\_\_

Supplementary material: List of genes of the Gene Panel Sequencing for Retinitis pigmentosa, in alphabetic order.

ABCA4, ABCC6, ABHD12, ACBD5, ACO2, ADAM9, ADAMTS18, ADAMTSL4, ADGRA3, ADGRV1, ADIPOR1, AGBL5, AHI1, AHR, AIPL1, ALMS1, ARHGEF18, ARL13B, ARL2BP, ARL3, ARL6, ARMC9, ARSG, ASRGL1, ATF6, ATOH7, B9D1, BBIP1, BBS1, BBS10, BBS12, BBS2, BBS4, BBS5, BBS7, BBS9, BEST1, C10orf11, C12orf65, C1QTNF5, C8orf37, CA4, CABP4, CACNA1F, CACNA2D4, CAPN5, CC2D2A, CCT2, CDH23, CDH3, CDHR1, CEP164, CEP19, CEP250, CEP290, CEP41, CEP78, CEP83, CERKL, CFAP410, CHM, CIB2, CISD2, CLCC1, CLN3, CLN5, CLN6, CLN8, CLRN1, CLUAP1, CNGA1, CNGA3, CNGB1, CNGB3, CNNM4, COL11A1, COL11A2, COL18A1, COL2A1, COL9A1, COL9A2, COL9A3, CPLANE1, CRB1, CRX, CSPP1, CTNNA1, CTSD, CWC27, CYP4V2, DHDDS, DHX32, DHX38, DNAJC17, DRAM2, DSCAML1, DTHD1, EFEMP1, ELOVL4, EMC1, ERCC6, EXOSC2, EYS, FAM161A, FBLN5, FLVCR1, FRMD7, FSCN2, FZD4, GDF6, GNAT1, GNAT2, GNB3, GNPTG, GNS, GPR143, GPR179, GPR45, GRM6, GRN, GUCA1A, GUCA1B, GUCY2D, HARS, HGSNAT, HK1, HMCN1, HMX1, IDH3A, IDH3B, IFT140, IFT172, IFT27, IFT43, IFT74, IFT80, IFT81, IFT88, IMPDH1, IMPG1, IMPG2, INPP5E, INVS, IQCB1, ITM2B, JAG1, KCNJ13, KCNV2, KIAA0586, KIAA1549, KIF11, KIF7, KIZ, KLHL7, LCA5, LRAT, LRIT3, LRP2, LRP5, LYST, LZTFL1, MAK, MAPKAPK3, MERTK, MFN2, MFRP, MFSD8, MIR204, MKKS, MKS1, MPDZ, MTPAP, MTPP, MYO7A, NAGLU, NBAS, NDP, NEK2, NEUROD1, NMNAT1, NPHP1, NPHP3, NPHP4, NR2E3, NR2F1, NRL, NYX, OAT, OCA2, OFD1, OPA1, OPA3, OPN1SW, OR2W3, OTX2, P3H2, PAX2, PAX6, PCARE, PCDH15, PCYT1A, PDE6A, PDE6B, PDE6C, PDE6D, PDE6G, PDE6H, PDZD7, PEX1, PEX10, PEX11B, PEX12, PEX13, PEX14, PEX16, PEX19, PEX2, PEX26, PEX3, PEX5, PEX6, PEX7, PHYH, PITPNM3, PLA2G5, PLK4, PNPLA6, POC1B, POC5, POMGNT1, PPT1, PRCD, PRDM13, PROM1, PRPF3, PRPF31, PRPF4, PRPF6, PRPF8, PRPH2, PRPS1, RAB28, RAX2, RBP1, RBP3, RBP4, RCBTB1, RD3, RDH11, RDH12, RDH5, REEP6, RGR, RGS9, RGS9BP, RHO, RIMS1, RLBP1, ROM1, RP1, RP1L1, RP2, RP9, RPE65, RPGRIP1, RPGRIP1L, RS1, RTN4IP1, SAG, SAMD11, SCLT1, SDCCAG8, SEMA4A, SGSH, SIX6, SLC24A1, SLC24A5, SLC45A2, SLC7A14, SNRNP200, SPATA7, SPP2, TCTN1, TCTN2, TCTN3, TEAD1, TIMM8A, TIMP3, TMED7, TMEM107, TMEM126A, TMEM138, TMEM216, TMEM231, TMEM237, TMEM67, TOPORS, TPP1, TRAF3IP1, TREX1, TRIM32, TRNT1, TRPM1, TSPAN12, TTC21B, TTC8, TTLL5, TTPA, TUB, TUBGCP4, TUBGCP6, TULP1, TYR, TYRP1, UNC119, USH1C, USH1G, USH2A, VCAN, VPS13B, WDPCP, WDR19, WDR34, WFS1, WHRN, ZNF408, ZNF423, ZNF513.
